# Supplementary material for: Analysis of therapeutic monoclonal antibodies by imaged capillary isoelectric focusing (icIEF)
Source: Royal Society of Chemistry journal article supplement (doi:10.1039/d4ay00836g), 2024-01-01
Supplement: d4ay00836g1.pdf [file d4ay00836g1.pdf]

Electronic Supplementary Information

**Analysis of therapeutic monoclonal antibodies by imaged capillary isoelectric focusing (icIEF)**

Haley Sutton, Feng Hong, Xuemei Han, Navin Rauniyar\*

Tanvex Biopharma USA, Inc., 10394 Pacific Center Ct, San Diego, CA 92121, USA

\*corresponding author: [nrauniyar@tanvex.com](mailto:nrauniyar@tanvex.com)

**Table S1** Details of 11 commercially available therapeutic mAbs

| <b>Generic Name</b> | <b>Brand Name</b> | <b>Subclass</b> | <b>Expiration Date</b> |
|---------------------|-------------------|-----------------|------------------------|
| Adalimumab          | Humira            | IgG1            | May 2018               |
| Bevacizumab         | Avastin           | IgG1            | Jul 2017               |
| Ipilimumab          | Yervoy            | IgG1            | Dec 2015               |
| Omalizumab          | Xolair            | IgG1            | Jul 2019               |
| Pertuzumab          | Perjeta           | IgG1            | Apr 2021               |
| Tocilizumab         | Actemra           | IgG1            | Aug 2019               |
| Denosumab           | Prolia            | IgG2            | Nov 2018               |
| Panitumumab         | Vectibix          | IgG2            | Oct 2015               |
| Nivolumab           | Opdivo            | IgG4            | Nov 2019               |
| Pembrolizumab       | Keytruda          | IgG4            | Feb 2022               |
| Eculizumab          | Soliris           | IgG2/4          | May 2018               |

**Table S2** iCE3 system configuration

| <b>iCE Analyzer</b>       |                                 |
|---------------------------|---------------------------------|
| iCE Analyzer Model        | iCE3                            |
| Lamp Type                 | Deuterium                       |
| Sample Transfer Time      | 70 sec                          |
| <b>Autosampler</b>        |                                 |
| Autosampler Model         | 720NV                           |
| Syringe Size              | 250 µL                          |
| Syringe Load Rate         | 5 µL/sec                        |
| Syringe Inject Rate       | 7 µL/min                        |
| Withdraw Rate             | 5 µL/sec                        |
| Load Duration             | 6 sec                           |
| Sample Injection Duration | 70 and 90 sec                   |
| Transfer Time Delay       | 0 min                           |
| Rinse Rate                | 50 µL/sec                       |
| Tray Type                 | 48 Vial Tray with 4 Rinse Vials |
| Needle Depth              | 48 mm                           |

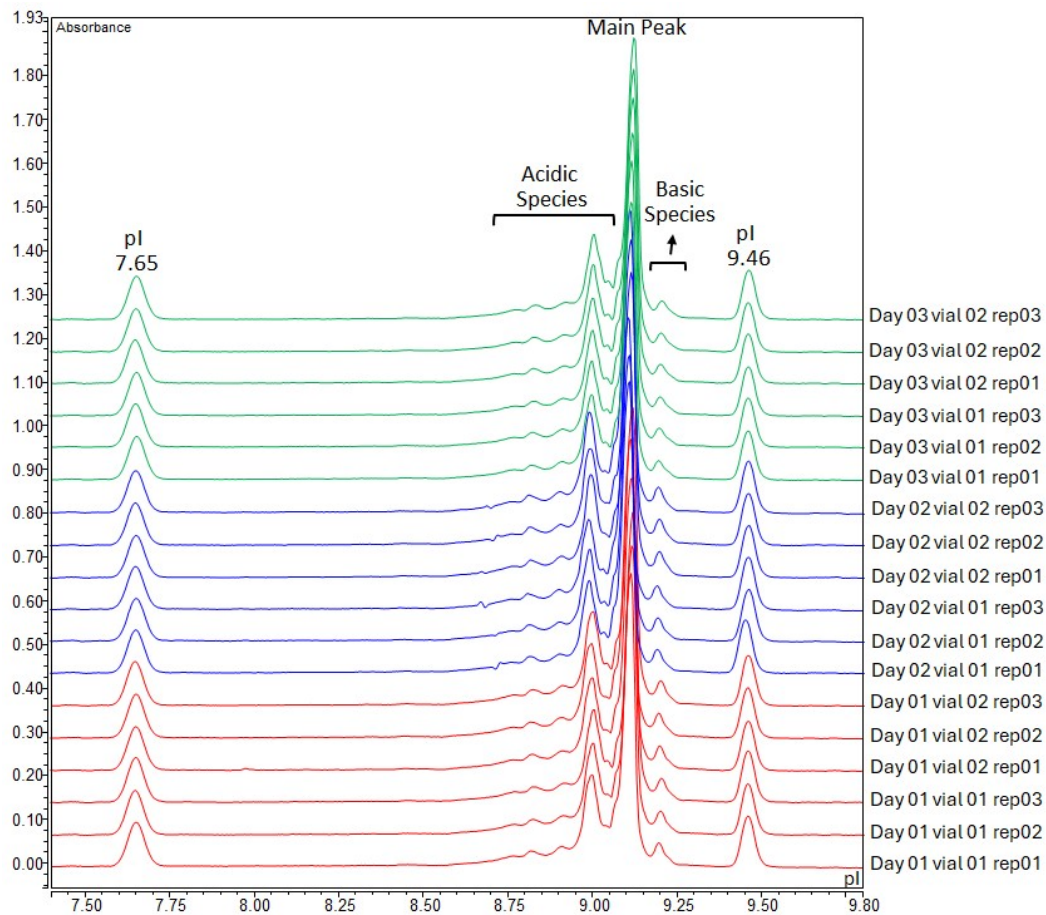

**Fig. S1** Overlaid icIEF electropherograms of mAb-1 demonstrating reproducibility  
 (Experimental conditions: 5% Pharmalyte pH 3-10, mAb-1 concentration 0.4 mg/mL, focusing time: 8 min at 3 kV)

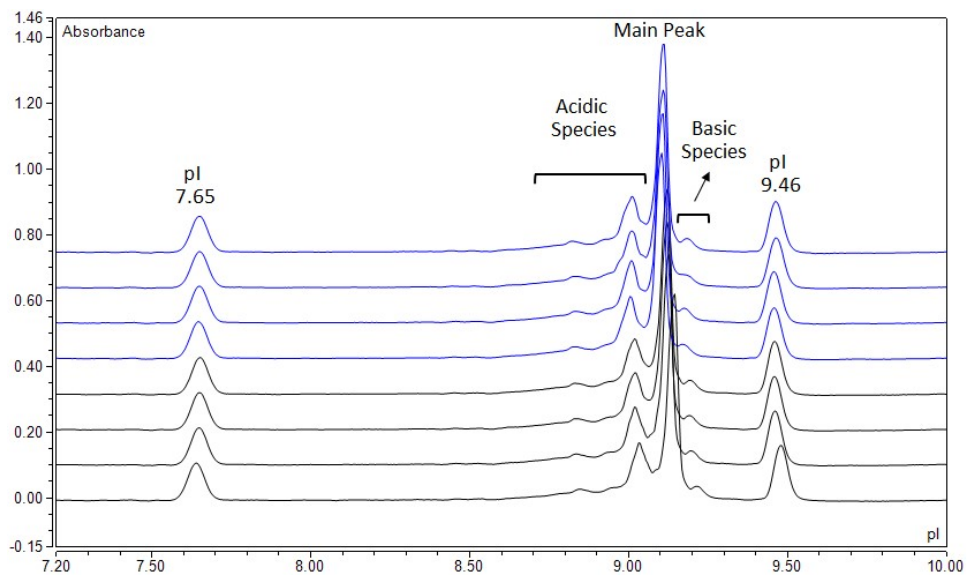

**Fig. S2** Overlay of icIEF electropherograms of mAb-1 analyzed in replicates at two different time points: 0 hours (black traces) and 24 hours (blue traces).

**(Experimental conditions:** Same as Figure S1)

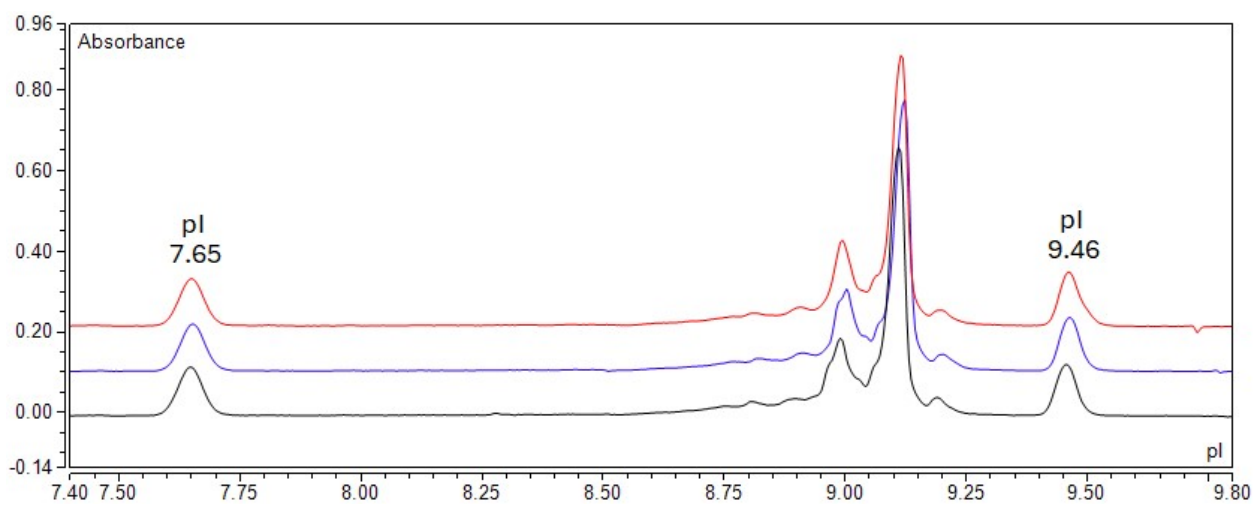

**Fig. S3** Overlaid icIEF electropherograms of mAb-1 at three different concentrations of Pharmalyte pH 3-10: 4.75% (black), 5.0% (blue), and 5.25% (red)

(Experimental conditions: mAb-1 concentration, 0.4 mg/mL; focusing time: 8 min at 3.0 kV)

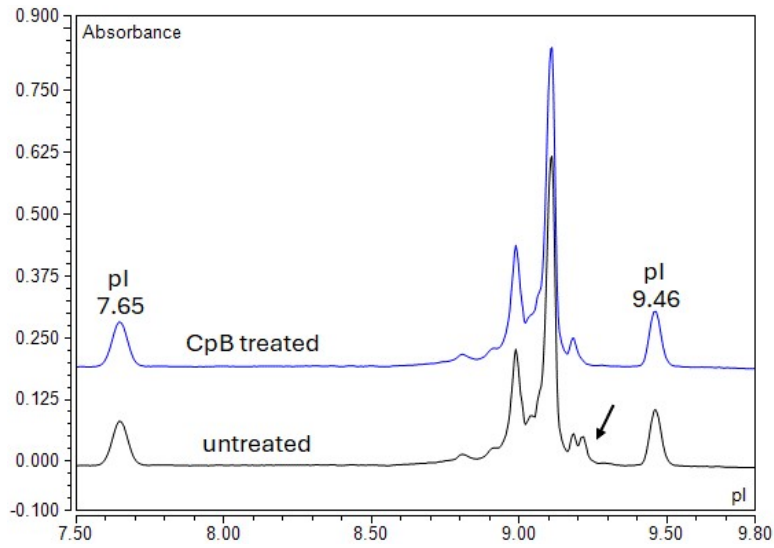

**Fig. S4** icIEF electropherograms of an EU-Herceptin, untreated (black trace) and treated with carboxypeptidase B (blue trace)

**Note:** Carboxypeptidase (CpB) selectively cleaves Lys residues at the C-terminal end of proteins.

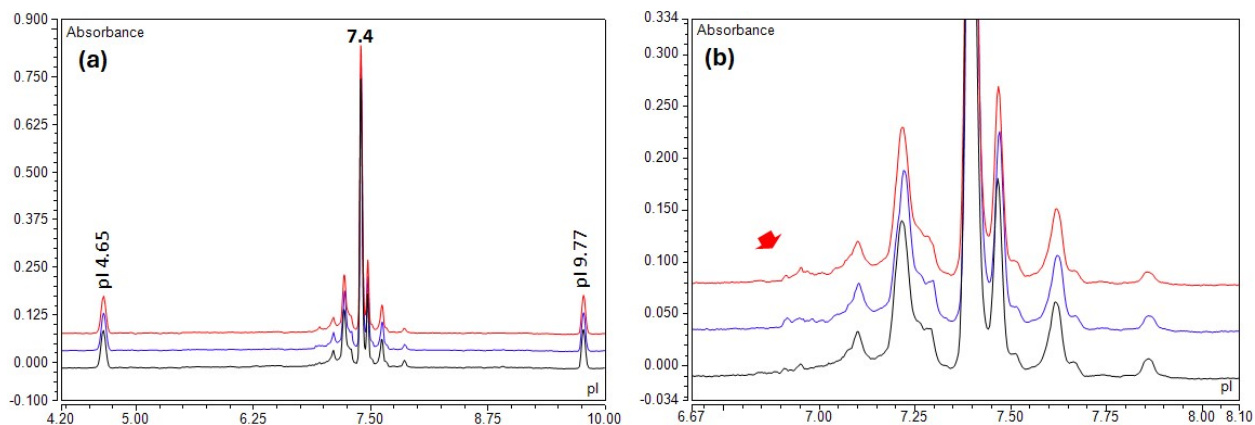

**Fig. S5** Overlay of three replicate injections of pembrolizumab (Keytruda) icIEF electropherograms with focusing time of 6 min **(a)** Full view **(b)** zoomed-in view.

**Note:** The arrow indicates spikes, formed possibly due to protein precipitation.

**(Experimental conditions:** 0.35% methyl cellulose, 4% Pharmalyte pH 3-10, mAb concentration 0.6 mg/mL)

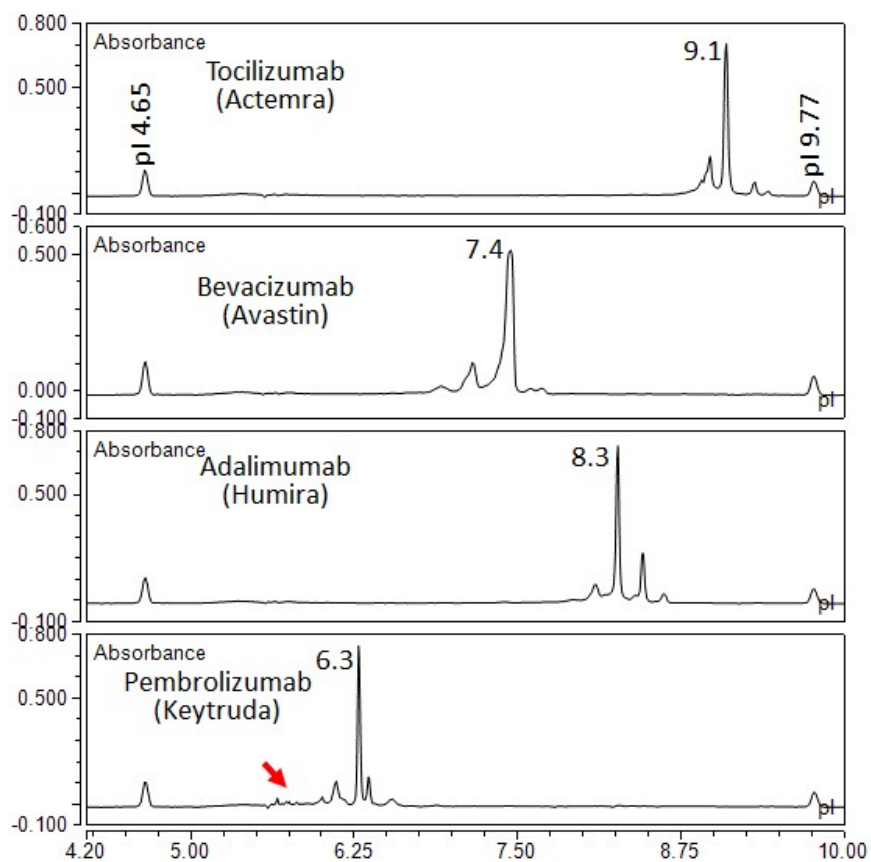

**Fig. S6** icIEF electropherograms of four therapeutic mAbs

**Note:** The arrow indicates spikes, possibly due to protein precipitation.

**(Experimental conditions:** 0.35% methyl cellulose, 2% Pharmalyte pH 3-10, 2% Pharmalyte pH 8-10.5, mAb concentration 0.6 mg/mL, focusing time: 10 min at 3 kV)



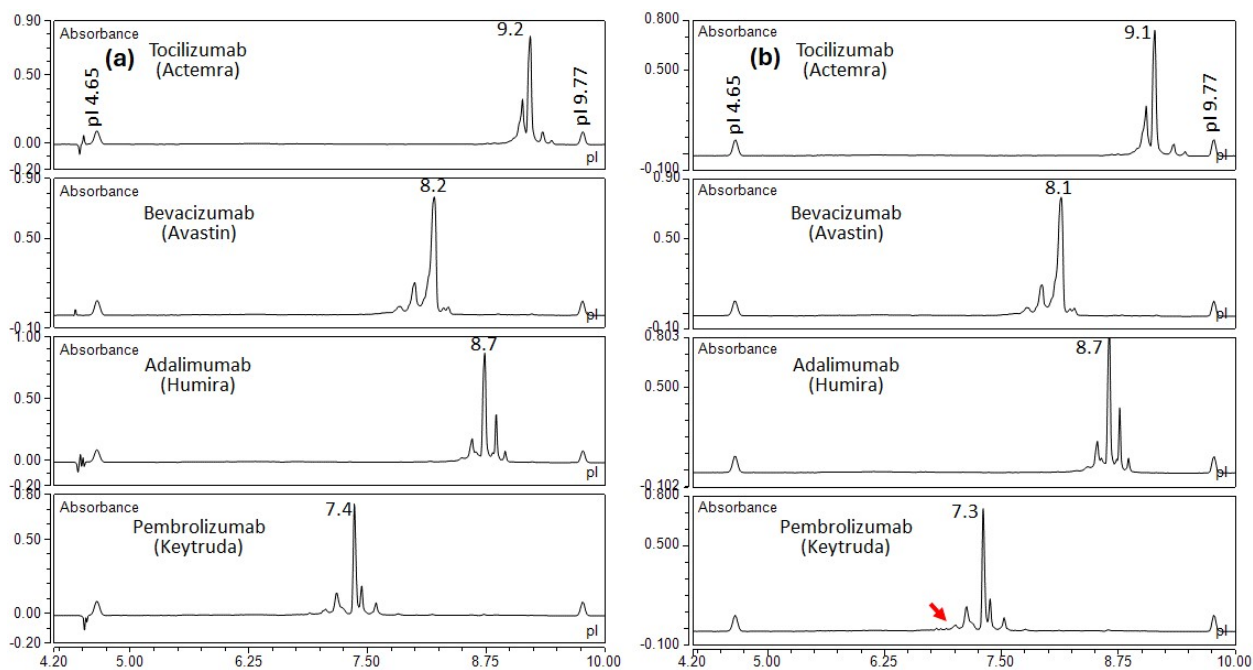

**Fig. S7** icIEF electropherograms of four therapeutic mAbs **(a)** focusing time 8 min at 3 kV, **(b)** focusing time 10 min at 3 kV

**Note:** The arrow indicates spikes, possibly due to protein precipitation.

**(Experimental conditions:** 0.35% methyl cellulose, 4% Pharmalyte pH 3-10, 4 mM arginine, mAb concentration 0.6 mg/mL)

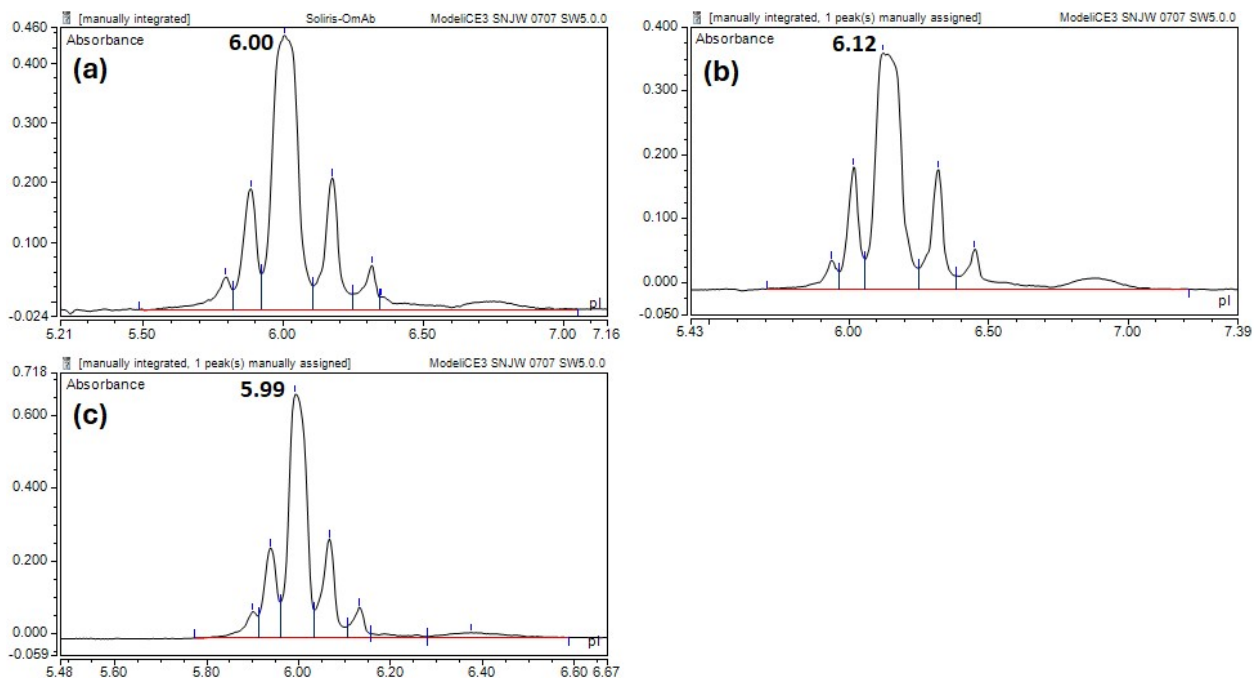

**Fig. S8** Zoomed-in view of icIEF electropherograms of eculizumab (Soliris) under **(a)** native condition with 4% Pharmalyte pH 3-10, 4 mM arginine, **(b)** denaturing condition with 3.2 M urea, 4% Pharmalyte pH 3-10, and **(c)** denaturing condition with 3.2 M urea, 2% Pharmalyte pH 3-10 and 2% Pharmalyte pH 8-10.5 mixture.

(mAb concentration: 0.6 mg/mL and focusing time: 8 min for native and 10 min for denaturing conditions)

**Note:** The broad peak in the basic region could be contributed by aggregates because size exclusion chromatography analysis showed 9.2% of high molecular weight species. No low molecular weight species were detected.

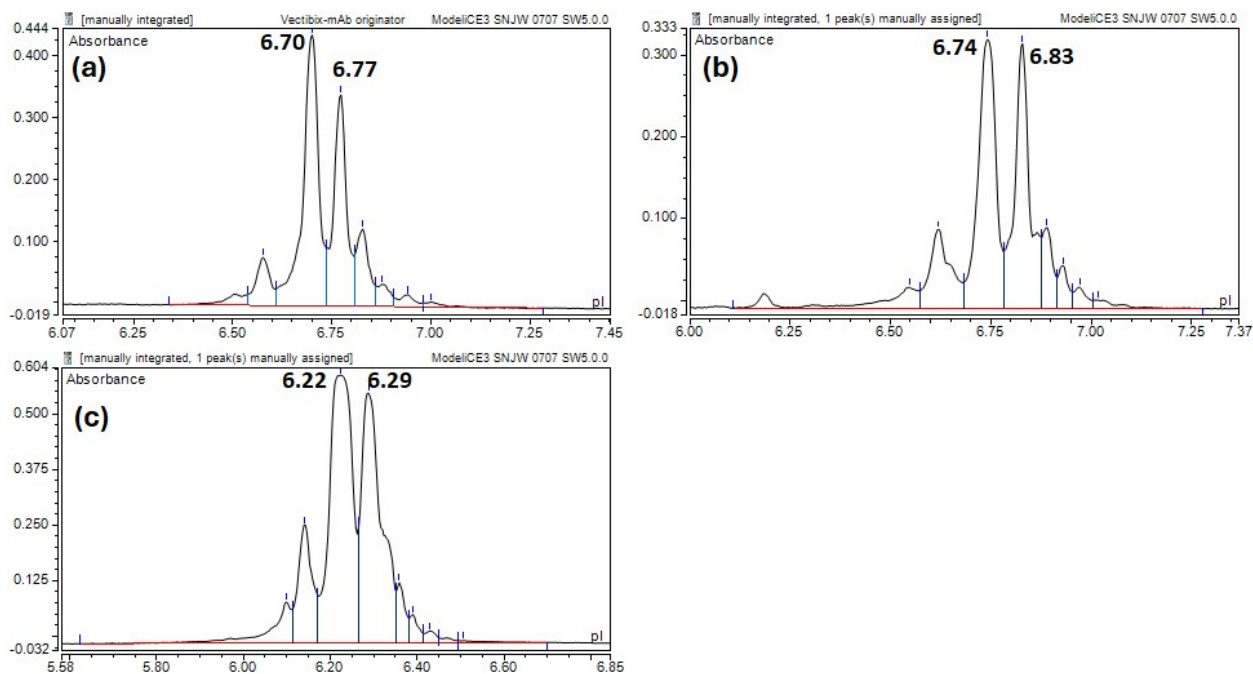

**Fig. S9** Zoomed-in view of icIEF electropherograms of panitumumab (Vectibix) under **(a)** native condition with 4% Pharmalyte pH 3-10, **(b)** denaturing condition with 3.2 M urea, 4% Pharmalyte pH 3-10, and **(c)** denaturing condition with 3.2 M urea, 2% Pharmalyte pH 3-10 and 2% Pharmalyte pH 8-10.5 mixture.

(mAb concentration: 0.6 mg/mL and focusing time: 10 min for native and denaturing conditions)

**Note:** The two main peaks are possibly due to formation of disulfide isoforms (**Reference:** A. Resemann, L. Liu-Shin, G. Tremintin, A. Malhotra, A. Fung, F. Wang, G. Ratnaswamy and D. Suckau, *MAbs*, 2018, **10**, 1200–1213)

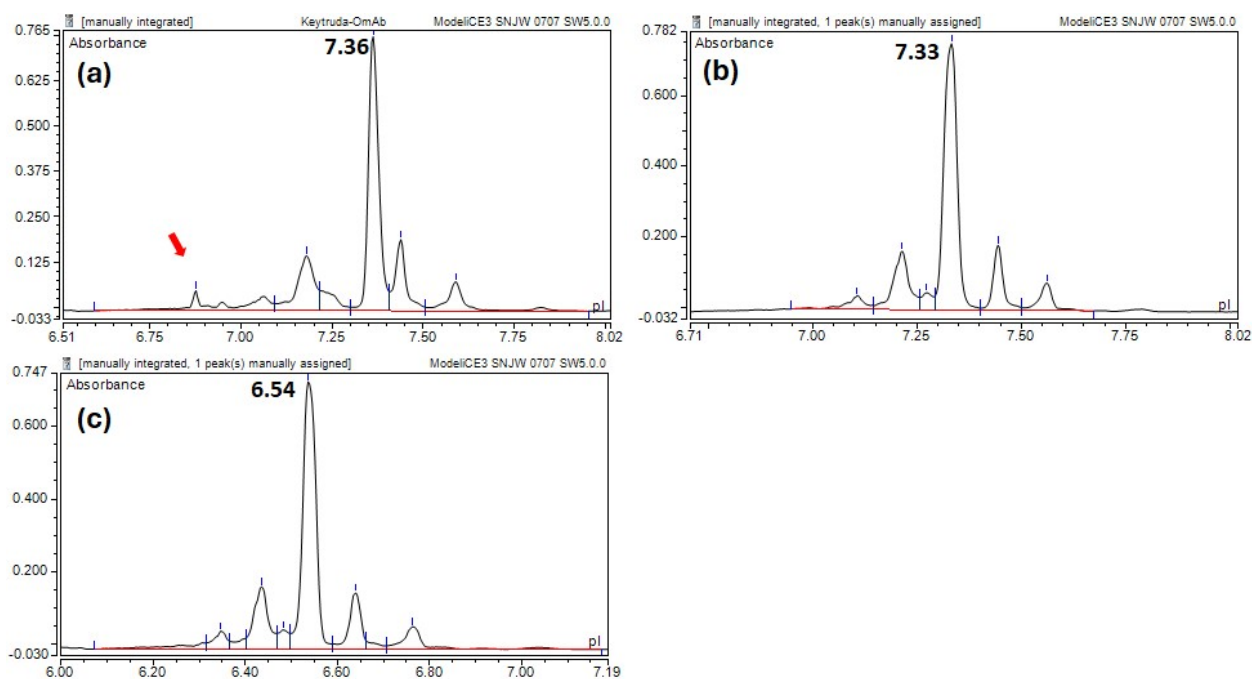

**Fig. S10** Zoomed-in view of icIEF electropherograms of pembrolizumab (Keytruda) under **(a)** native condition with 4% Pharmalyte pH 3-10, 4 mM arginine, **(b)** denaturing condition with 3.2 M urea, 4% Pharmalyte pH 3-10, and **(c)** denaturing condition with 3.2 M urea, 2% Pharmalyte pH 3-10 and 2% Pharmalyte pH 8-10.5 mixture.

(mAb concentration: 0.6 mg/mL and focusing time: 8 min for native and 10 min for denaturing conditions)

**Note:** The arrow indicates spikes, possibly due to protein precipitation.

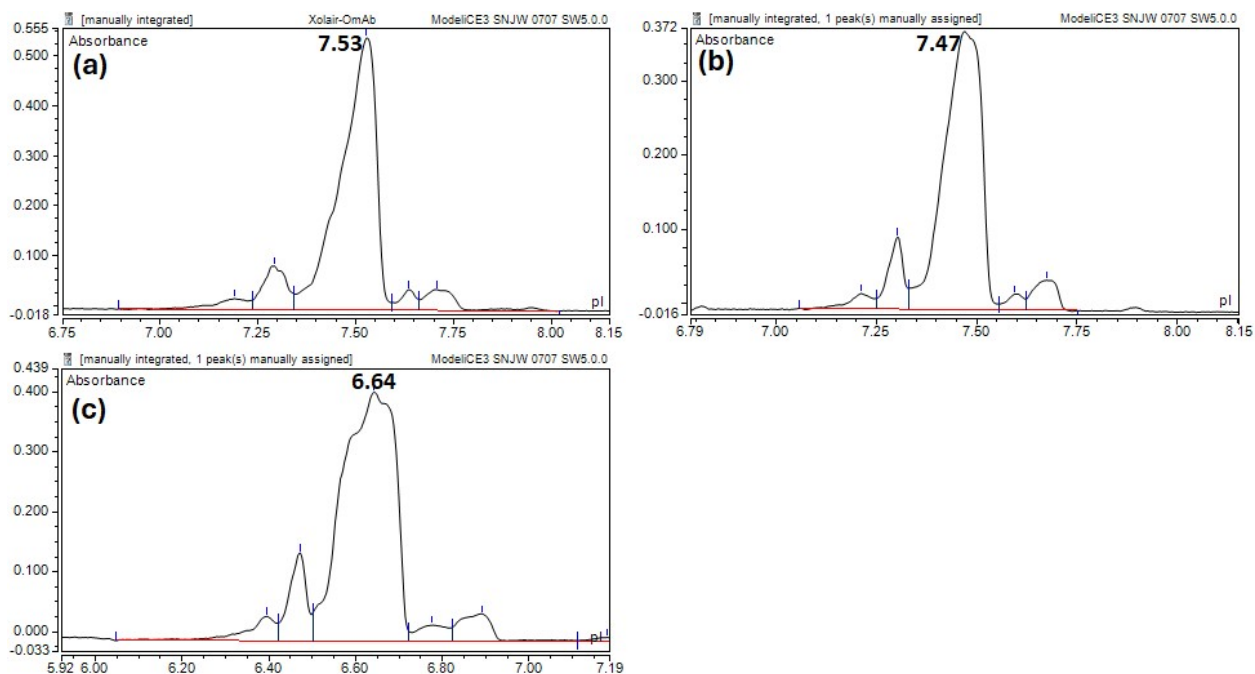

**Fig. S11** Zoomed-in view of icIEF electropherograms of omalizumab (Xolair) under **(a)** native condition with 4% Pharmalyte pH 3-10, 4 mM arginine, **(b)** denaturing condition with 3.2 M urea, 4% Pharmalyte pH 3-10, and **(c)** denaturing condition with 3.2 M urea, 2% Pharmalyte pH 3-10 and 2% Pharmalyte pH 8-10.5 mixture.

(mAb concentration: 0.6 mg/mL and focusing time: 8 min for native and 10 min for denaturing conditions)

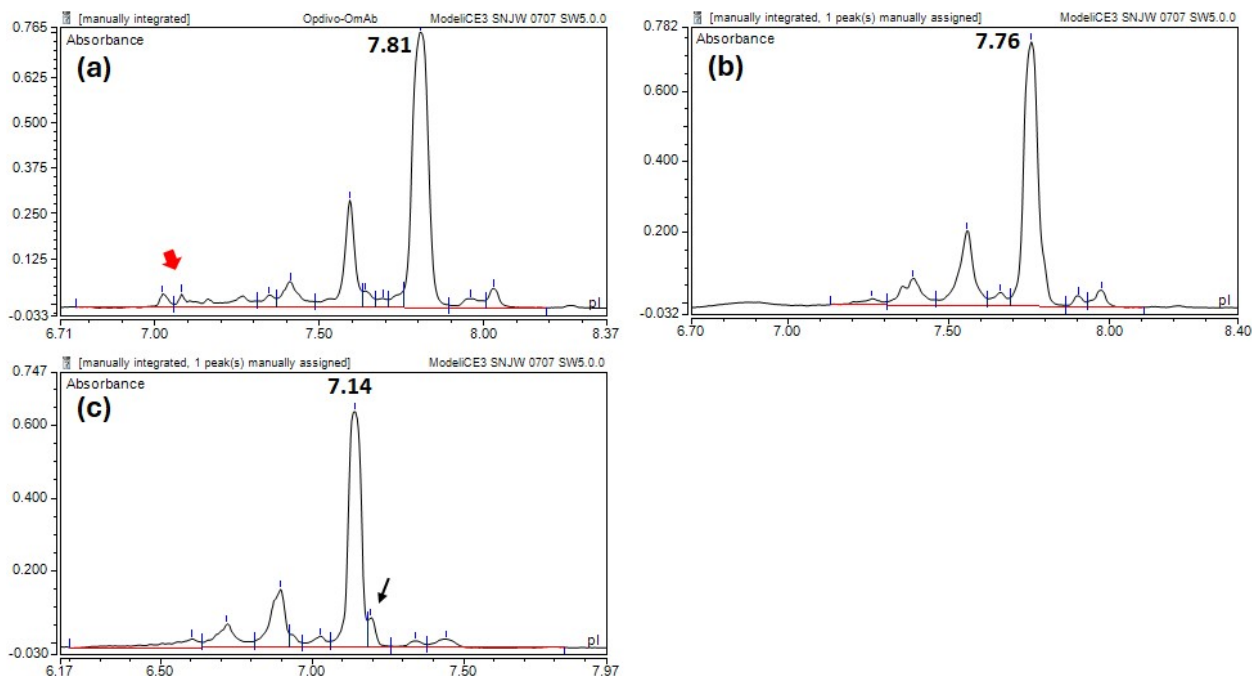

**Fig. S12** Zoomed-in view of icIEF electropherograms of nivolumab (Opdivo) under **(a)** native condition with 4% Pharmalyte pH 3-10, 4 mM arginine, **(b)** denaturing condition with 3.2 M urea, 4% Pharmalyte pH 3-10, and **(c)** denaturing condition with 3.2 M urea, 2% Pharmalyte pH 3-10 and 2% Pharmalyte pH 8-10.5 mixture.

(mAb concentration: 0.6 mg/mL and focusing time: 8 min for native and 10 min for denaturing conditions)

**Note:** The red arrow in panel (a) shows spikes, possibly due to protein precipitation and the black arrow in panel (c) shows clearly visible shoulder basic peak.

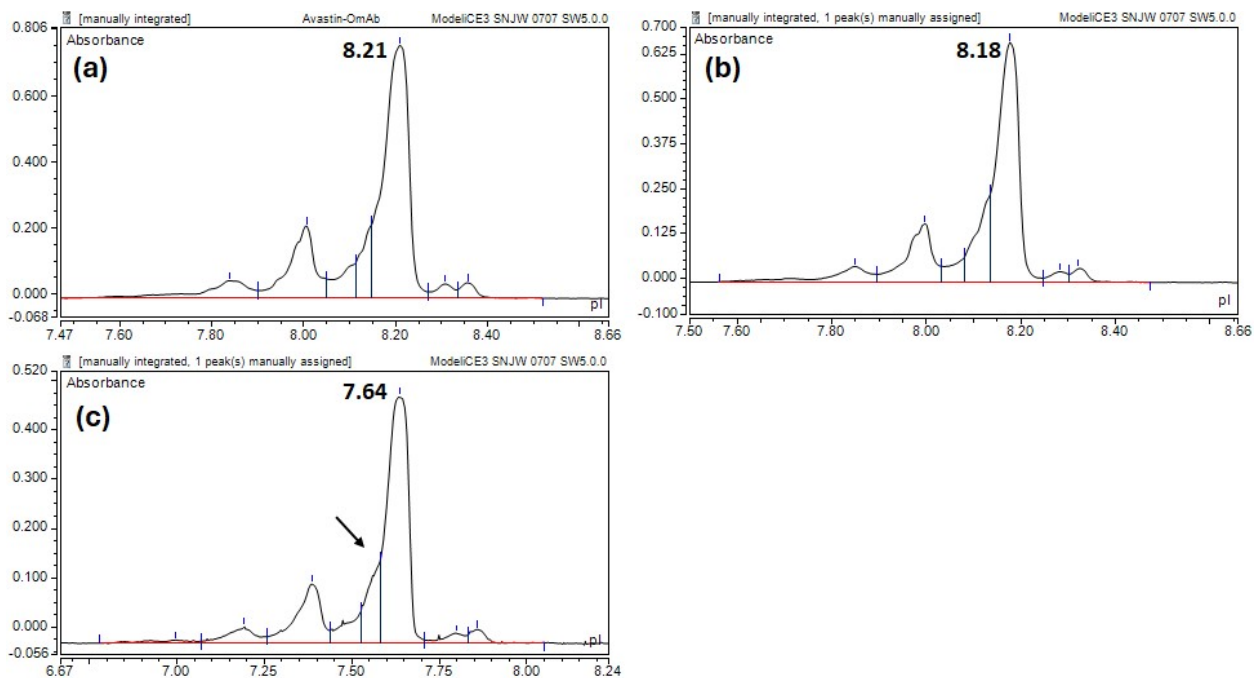

**Fig. S13** Zoomed-in view of icIEF electropherograms of bevacizumab (Avastin) under **(a)** native condition with 4% Pharmalyte pH 3-10, 4 mM arginine, **(b)** denaturing condition with 3.2 M urea, 4% Pharmalyte pH 3-10, and **(c)** denaturing condition with 3.2 M urea, 2% Pharmalyte pH 3-10 and 2% Pharmalyte pH 8-10.5 mixture.

(mAb concentration: 0.6 mg/mL and focusing time: 8 min for native and 10 min for denaturing conditions)

**Note:** arrow indicates shoulder acidic peak is clearly visible

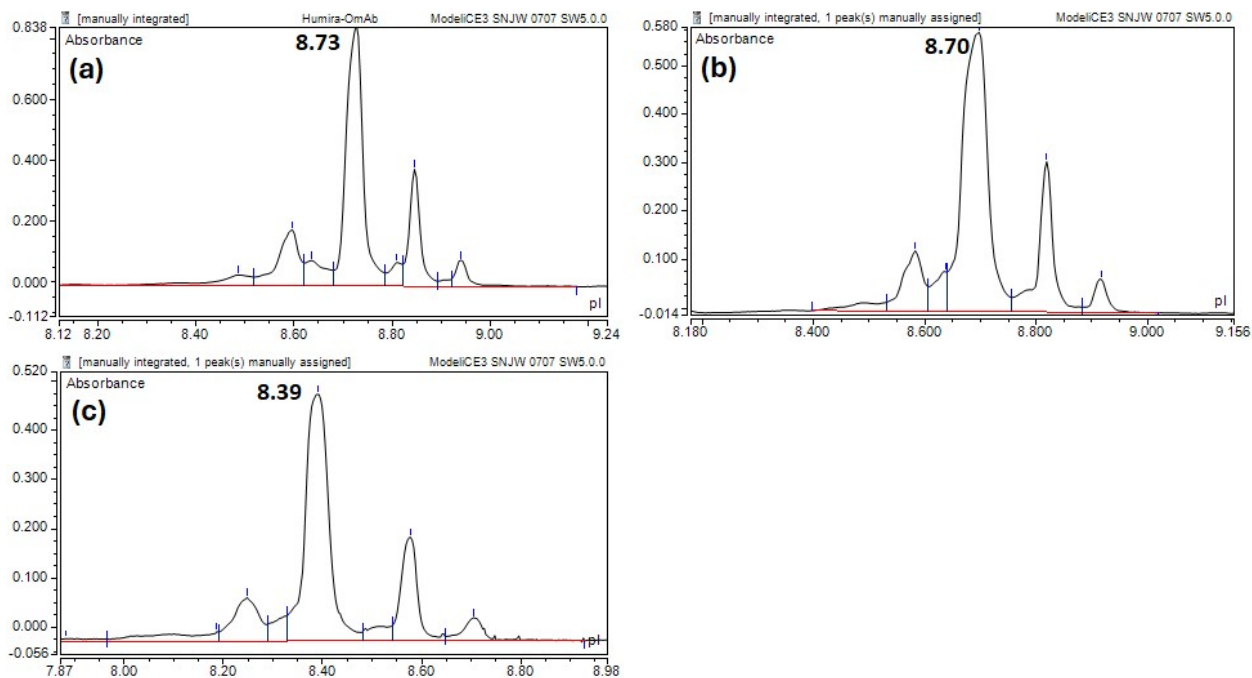

**Fig. S14** Zoomed-in view of icIEF electropherograms of adalimumab (Humira) under **(a)** native condition with 4% Pharmalyte pH 3-10, 4 mM arginine, **(b)** denaturing condition with 3.2 M urea, 4% Pharmalyte pH 3-10, and **(c)** denaturing condition with 3.2 M urea, 2% Pharmalyte pH 3-10 and 2% Pharmalyte pH 8-10.5 mixture.

(mAb concentration: 0.6 mg/mL and focusing time: 8 min for native and 10 min for denaturing conditions)



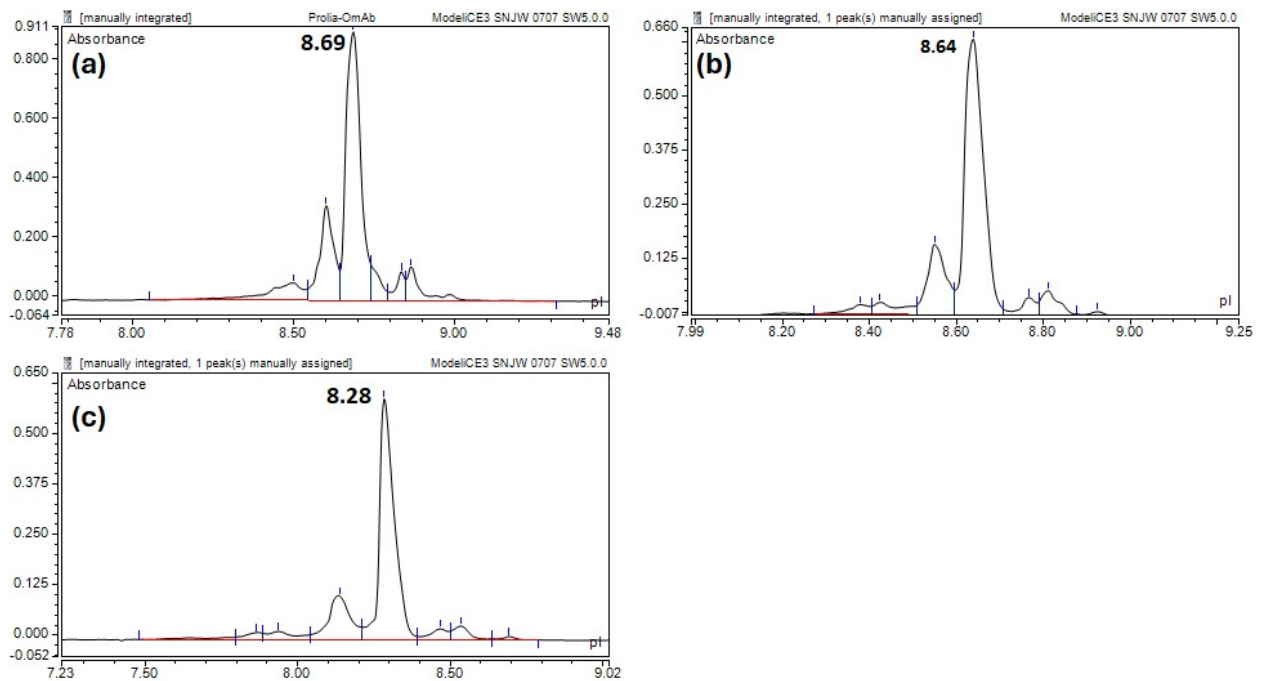

**Fig. S15** Zoomed-in view of icIEF electropherograms of denosumab (Prolia) under **(a)** native condition with 4% Pharmalyte pH 3-10, 4 mM arginine, **(b)** denaturing condition with 3.2 M urea, 4% Pharmalyte pH 3-10, and **(c)** denaturing condition with 3.2 M urea, 2% Pharmalyte pH 3-10 and 2% Pharmalyte pH 8-10.5 mixture.

(mAb concentration: 0.6 mg/mL and focusing time: 8 min for native and 10 min for denaturing conditions)

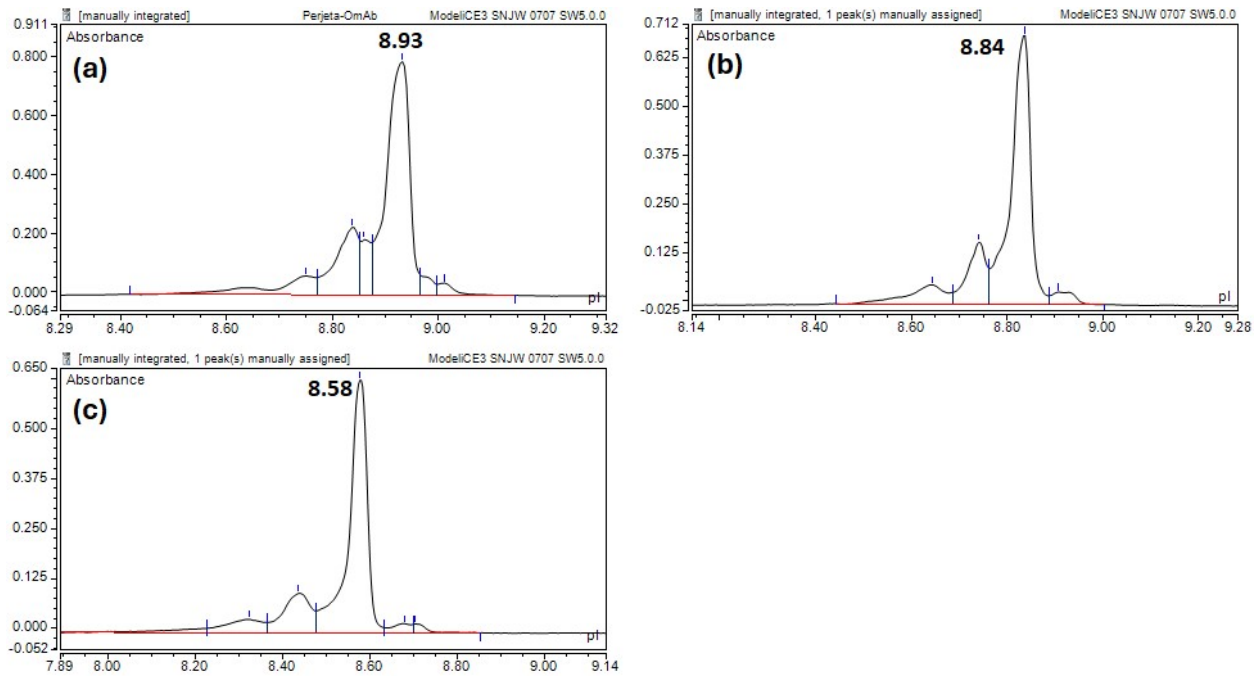

**Fig. S16** Zoomed-in view of icIEF electropherograms of pertuzumab (Perjeta) under **(a)** native condition with 4% Pharmalyte pH 3-10, 4 mM arginine, **(b)** denaturing condition with 3.2 M urea, 4% Pharmalyte pH 3-10, and **(c)** denaturing condition with 3.2 M urea, 2% Pharmalyte pH 3-10 and 2% Pharmalyte pH 8-10.5 mixture.

(mAb concentration: 0.6 mg/mL and focusing time: 8 min for native and 10 min for denaturing conditions)

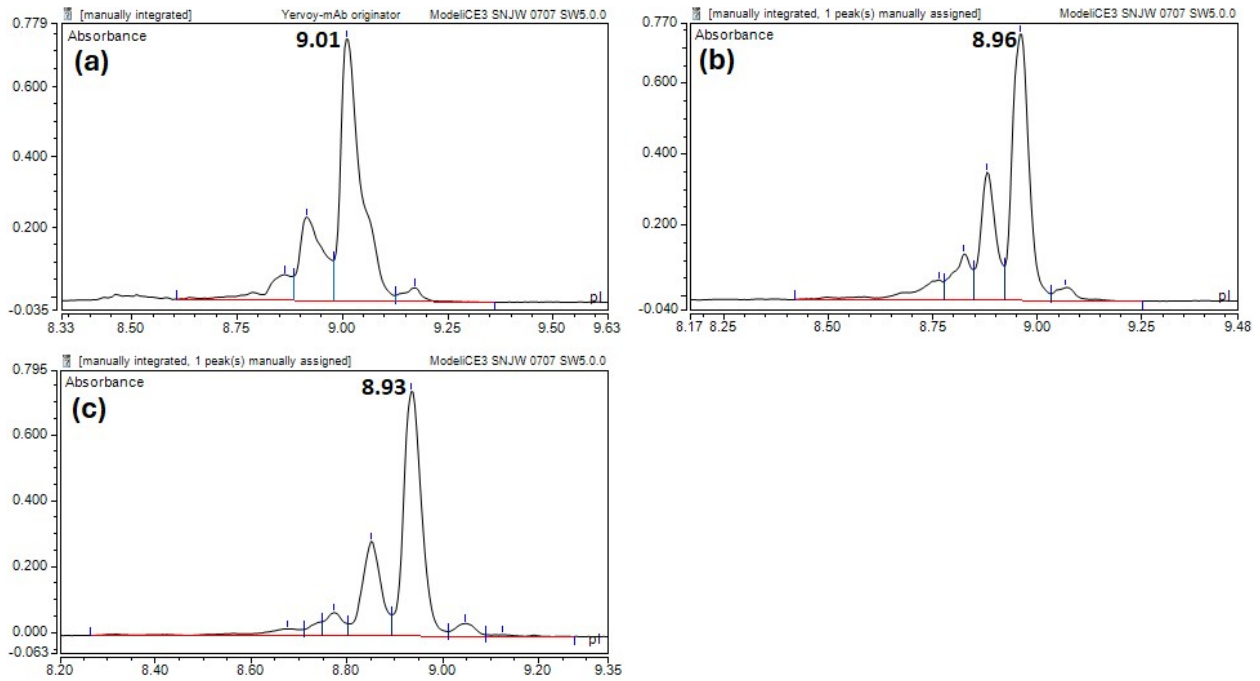

**Fig. S17** Zoomed-in view of icIEF electropherograms of ipilimumab (Yervoy) under **(a)** native condition with 4% Pharmalyte pH 3-10, **(b)** denaturing condition with 3.2 M urea, 4% Pharmalyte pH 3-10, and **(c)** denaturing condition with 3.2 M urea, 2% Pharmalyte pH 3-10 and 2% Pharmalyte pH 8-10.5 mixture.

(mAb concentration: 0.6 mg/mL and focusing time: 10 min for native and denaturing conditions)

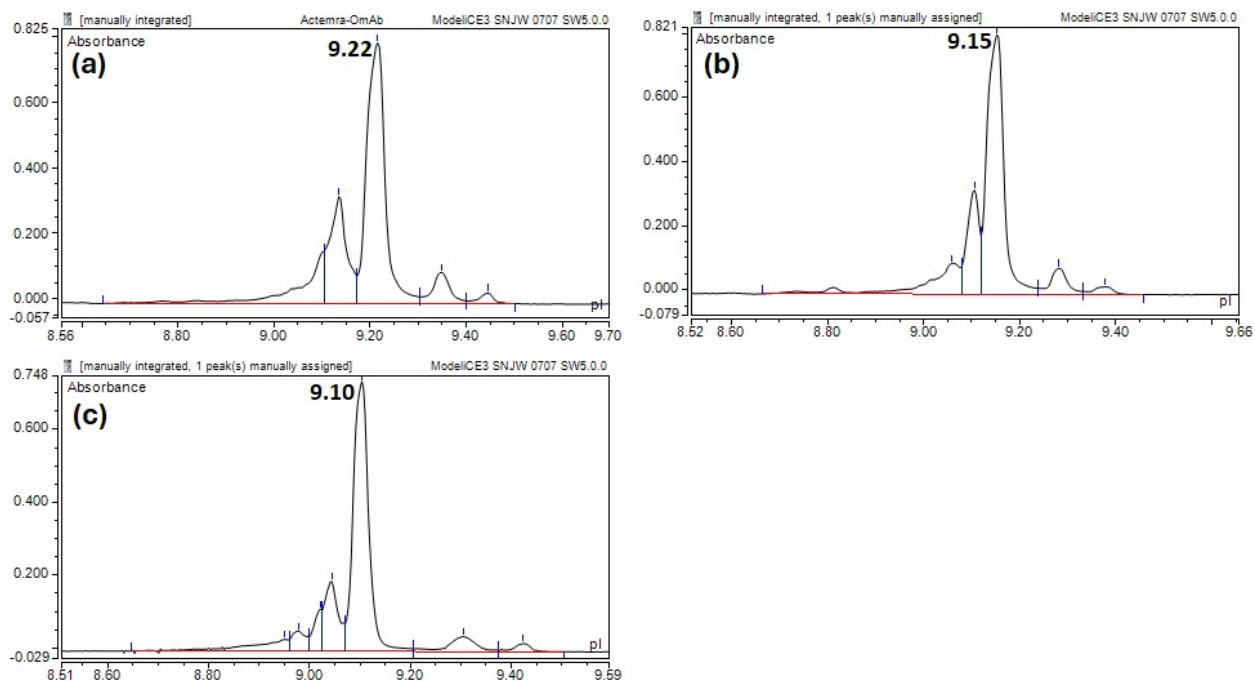

**Figure S18** Zoomed-in view of icIEF electropherograms of tocilizumab (Actemra) under **(a)** native condition with 4% Pharmalyte pH 3-10, 4 mM arginine, **(b)** denaturing condition with 3.2 M urea, 4% Pharmalyte pH 3-10, and **(c)** denaturing condition with 3.2 M urea, 2% Pharmalyte pH 3-10 and 2% Pharmalyte pH 8-10.5 mixture.

(mAb concentration: 0.6 mg/mL and focusing time: 8 min for native and 10 min for denaturing conditions)

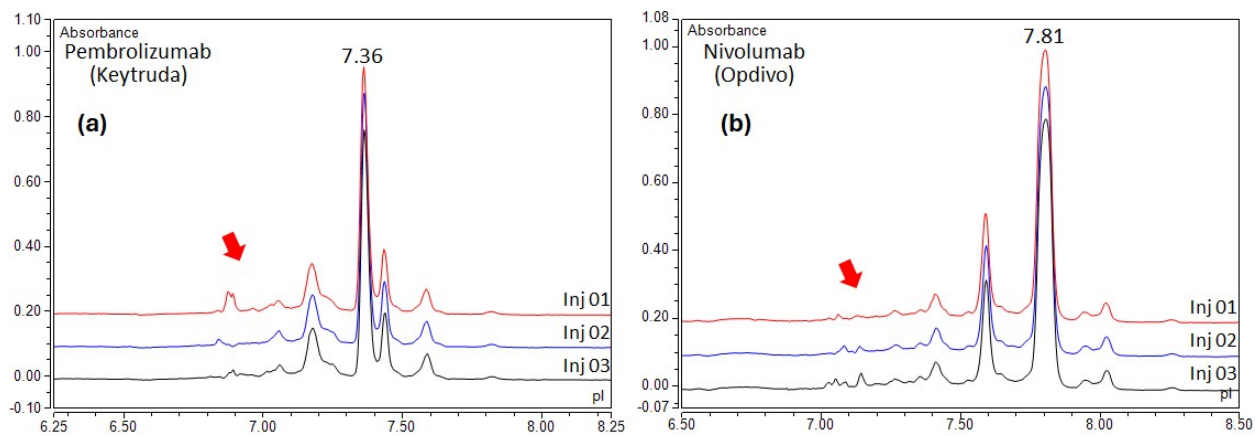

**Fig. S19** icIEF electropherograms of therapeutics mAbs **(a)** pembrolizumab (Keytruda) and **(b)** nivolumab (Opdivo)

**Note:** The arrow indicates non-reproducible spikes in the acidic region of the electropherograms, possibly due to protein precipitation.

**(Experimental conditions:** 0.35% methyl cellulose, 4% Pharmalyte pH 3-10, 4 mM arginine, mAb concentration 0.6 mg/mL, focusing time 8 min at 3kV)

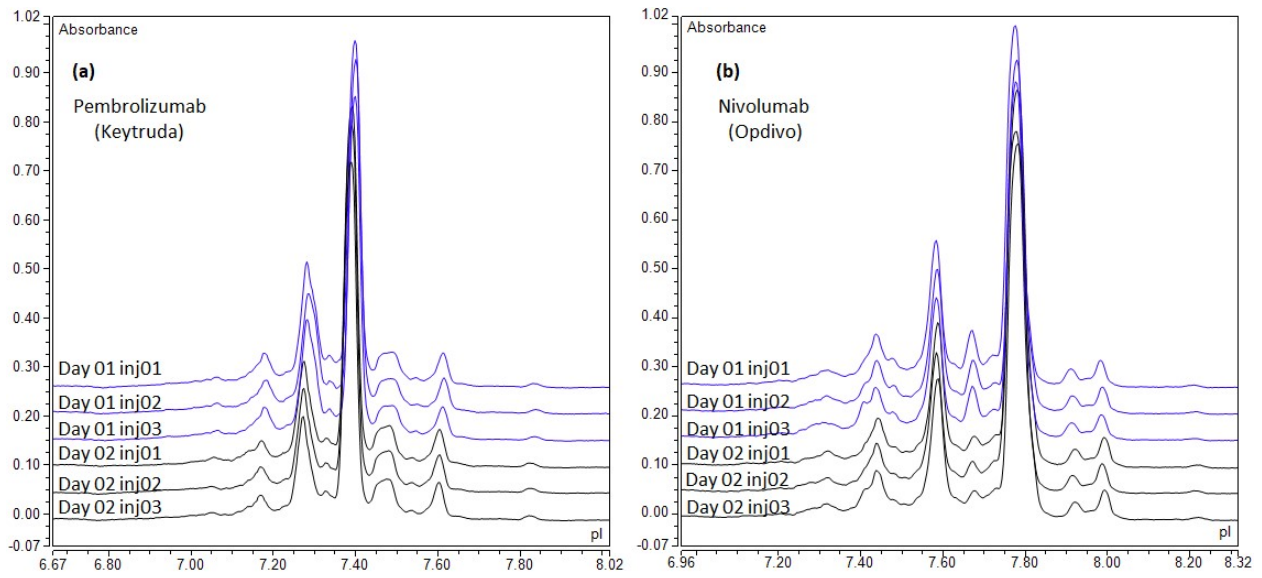

**Fig. S20** icIEF electropherograms of therapeutics mAbs **(a)** pembrolizumab (Keytruda) and **(b)** nivolumab (Opdivo)

**(Experimental conditions: 0.35% methyl cellulose, 4% Pharmalyte pH 3-10, mAb concentration 0.6 mg/mL, focusing time 10 min at 3kV)**

**Table S3** Main peak pIs of the 11 therapeutic mAbs

| mAbs                     | pI Values<br>(References:<br>5,19,20) | Observed Main Peak pI |                                 |                                                   |
|--------------------------|---------------------------------------|-----------------------|---------------------------------|---------------------------------------------------|
|                          |                                       | Native icIEF          | Denaturing icIEF<br>Pharm. 3-10 | Denaturing icIEF<br>Pharmalyte 3-10<br>and 8-10.5 |
| Eculizumab (Soliris)     | 6.1                                   | 6.00                  | 6.12                            | 5.99                                              |
| Panitumumab (Vectibix)   | 6.8                                   | 6.70/6.77*            | 6.74/6.83*                      | 6.22/6.29*                                        |
| Pembrolizumab (Keytruda) | 7.6                                   | 7.36                  | 7.33                            | 6.54                                              |
| Omalizumab (Xolair)      | 7.3                                   | 7.53                  | 7.47                            | 6.64                                              |
| Nivolumab (Opdivo)       | 8.0                                   | 7.81                  | 7.76                            | 7.14                                              |
| Bevacizumab (Avastin)    | 8.3                                   | 8.21                  | 8.18                            | 7.64                                              |
| Adalimumab (Humira)      | 8.9                                   | 8.73                  | 8.70                            | 8.39                                              |
| Denosumab (Prolia)       | 8.9                                   | 8.69                  | 8.64                            | 8.28                                              |
| Pertuzumab (Perjeta)     | 9.0                                   | 8.93                  | 8.84                            | 8.58                                              |
| Ipilimumab (Yervoy)      | 9.2                                   | 9.01                  | 8.96                            | 8.93                                              |
| Tocilizumab (Actemra)    | 9.2                                   | 9.22                  | 9.15                            | 9.10                                              |

\*Panitumumab can show two main peaks due to formation of disulfide isoforms (**Reference:** A. Resemann, L. Liu-Shin, G. Tremintin, A. Malhotra, A. Fung, F. Wang, G. Ratnaswamy and D. Suckau, *MABs*, 2018, **10**, 1200–1213)

**Table S4** Percentages of acidic, main, and basic species of the 11 therapeutic mAbs

| mAbs                     | Native icIEF |           |            | Denaturing icIEF<br>Pharm. 3-10 |           |            | Denaturing icIEF<br>Pharmalyte 3-10 and 8-10.5 |           |            |
|--------------------------|--------------|-----------|------------|---------------------------------|-----------|------------|------------------------------------------------|-----------|------------|
|                          | %<br>Acidic  | %<br>Main | %<br>Basic | %<br>Acidic                     | %<br>Main | %<br>Basic | %<br>Acidic                                    | %<br>Main | %<br>Basic |
| Eculizumab (Soliris)     | 18.30        | 55.53     | 26.17      | 16.85                           | 56.19     | 26.96      | 19.37                                          | 54.61     | 26.02      |
| Panitumumab (Vectibix)   | 9.79         | 74.74*    | 15.47      | 19.20                           | 67.81*    | 12.99      | 17.39                                          | 76.09*    | 6.52       |
| Pembrolizumab (Keytruda) | 31.55        | 47.01     | 21.46      | 23.14                           | 59.34     | 17.52      | 25.72                                          | 54.94     | 19.33      |
| Omalizumab (Xolair)      | 11.95        | 79.67     | 8.37       | 11.47                           | 80.78     | 7.74       | 13.55                                          | 77.55     | 8.90       |
| Nivolumab (Opdivo)       | 37.11        | 57.61     | 5.26       | 32.89                           | 62.19     | 4.93       | 35.59                                          | 55.48     | 8.91       |
| Bevacizumab (Avastin)    | 37.97        | 57.38     | 4.65       | 41.03                           | 54.53     | 4.45       | 38.93                                          | 56.66     | 4.44       |
| Adalimumab (Humira)      | 25.82        | 50.96     | 23.23      | 17.09                           | 59.81     | 23.11      | 20.56                                          | 54.79     | 24.65      |
| Denosumab (Prolia)       | 28.27        | 56.36     | 15.38      | 23.70                           | 66.04     | 10.26      | 25.79                                          | 65.45     | 8.74       |
| Pertuzumab (Perjeta)     | 34.02        | 61.01     | 4.97       | 25.01                           | 71.10     | 3.89       | 26.03                                          | 69.52     | 4.45       |
| Ipilimumab (Yervoy)      | 32.59        | 64.24     | 3.17       | 42.47                           | 54.12     | 3.41       | 36.43                                          | 59.40     | 4.17       |
| Tocilizumab (Actemra)    | 35.83        | 55.81     | 8.37       | 31.58                           | 60.03     | 8.39       | 30.66                                          | 61.05     | 8.29       |

\*sum of two main peaks for panitumumab.
